# Supplementary material
Source: publisher figshare collection journal article supplement (https://acs.figshare.com/ndownloader/files/3839044)

Supporting Material:

## Tracking Site-Specific C–C Coupling of Formaldehyde Molecules on Rutile TiO<sub>2</sub>(110)

Ke Zhu,<sup>†</sup> Yaobiao Xia,<sup>†</sup> Miru Tang,<sup>‡</sup> Zhi-Tao Wang,<sup>§</sup> Bryan Jan,<sup>†</sup> Igor Lyubinetsky,<sup>§</sup> Qingfeng Ge,<sup>‡</sup> Zdenek Dohnálek,<sup>||</sup> Kenneth T. Park,<sup>\*,†</sup> and Zhenrong Zhang<sup>\*,†</sup>

<sup>†</sup>Department of Physics, Baylor University, Waco, Texas 76798, United States

<sup>‡</sup>Department of Chemistry and Biochemistry, Southern Illinois University, Carbondale, Illinois 62901, United States

<sup>§</sup>Environmental Molecular Sciences Laboratory and <sup>||</sup>Fundamental and Computational Sciences Directorate, Institute for Interfacial Catalysis, Pacific Northwest National Laboratory, Richland, Washington 99352, United States

# **S1 Additional figure illustrating the formation of diolate**

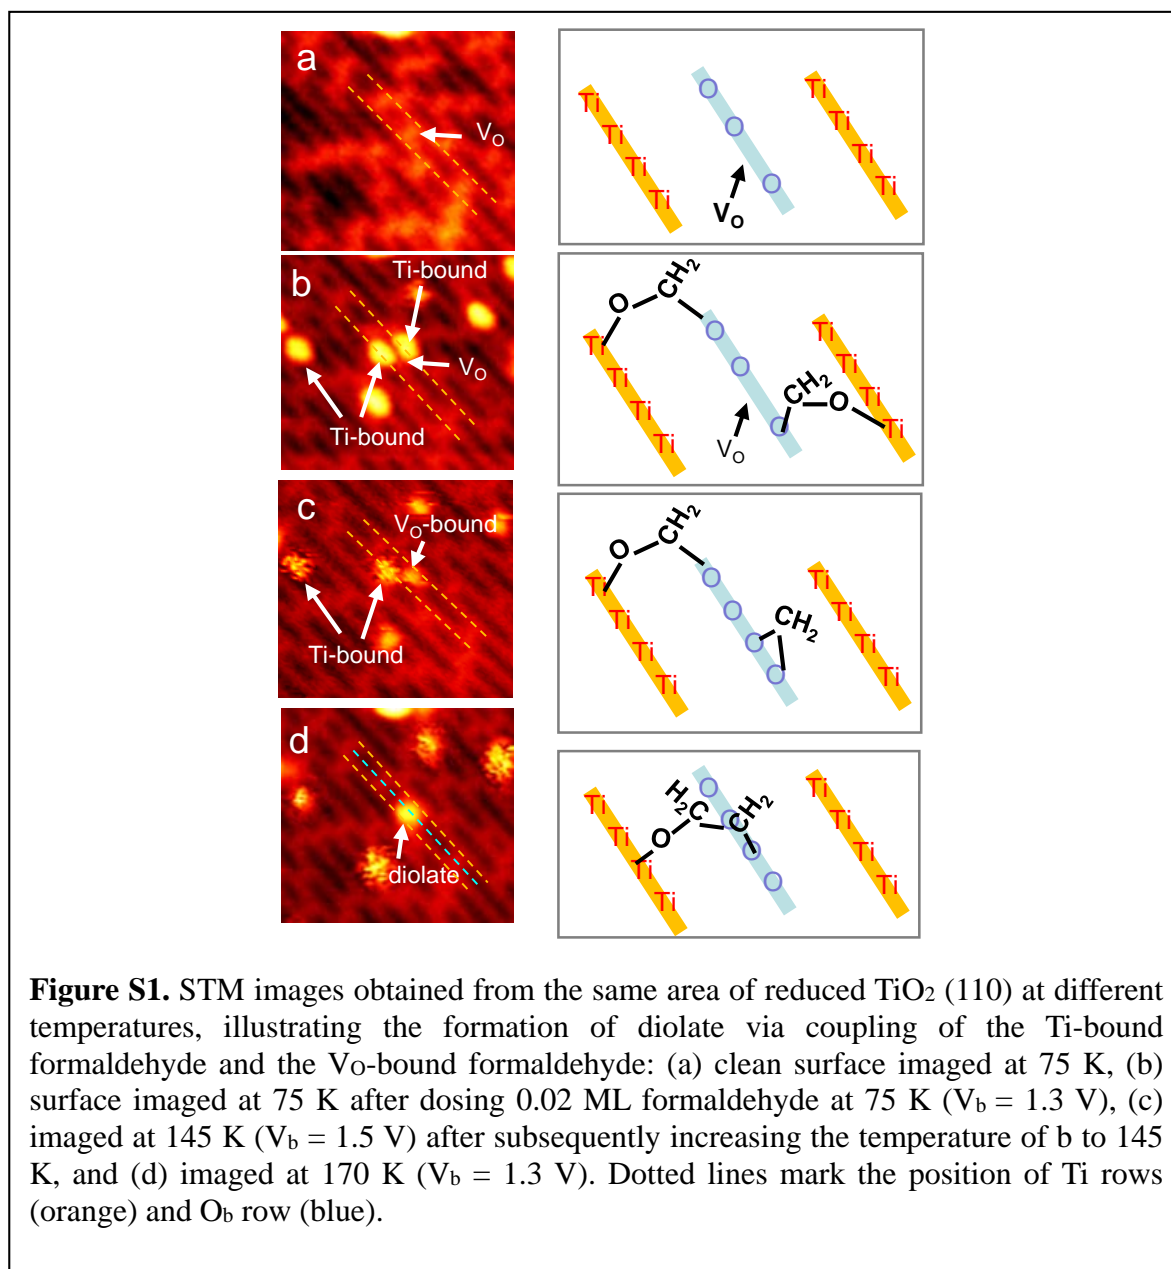

**S2 The STM images showing the initial and the final status of sequence A.**

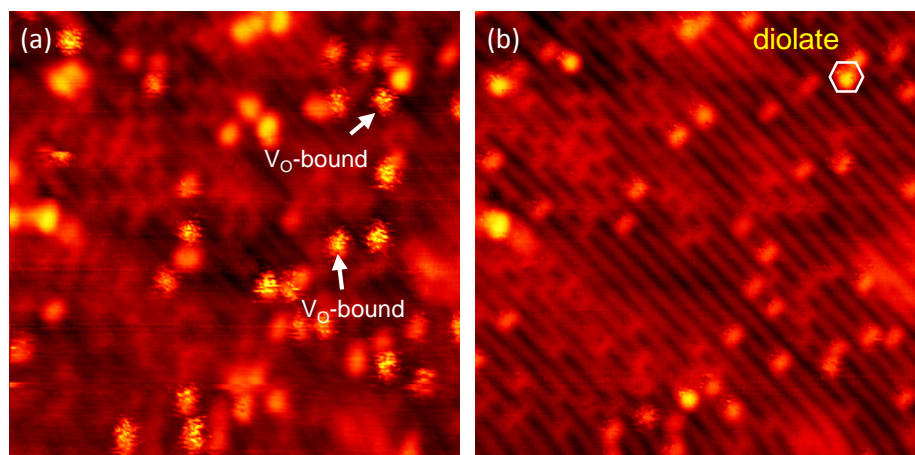

**Figure S2.** The isothermal STM images showing (a) the initial and (b) the final status of sequence A taken at 190 K.

**S3 The images showing the initial and the final status of sequence B.**

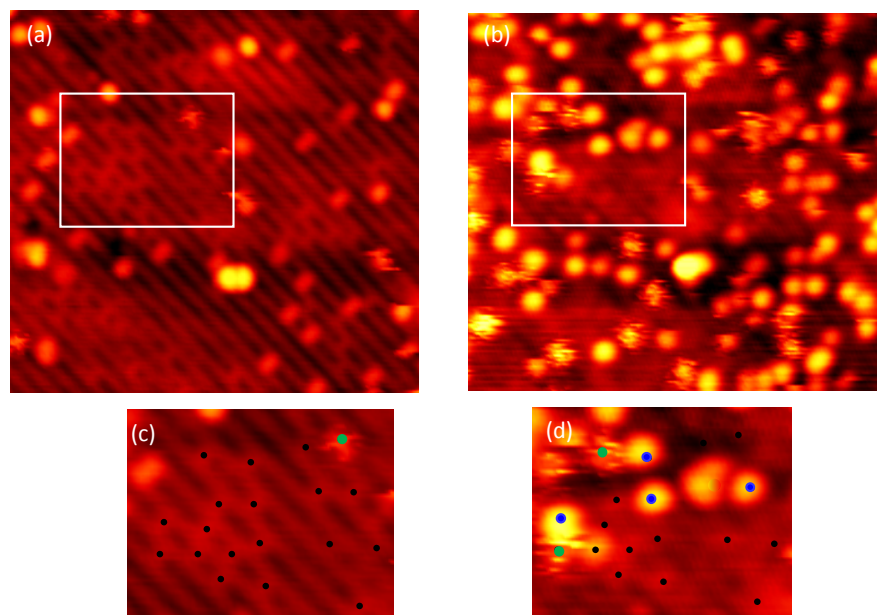

**Figure S3.** The isothermal STM images showing (a) the initial and (b) the final status of sequence B taken at 190 K. (c) and (d): Magnified areas marked in (a) and (b). Black dots mark the position of  $V_O$ 's. Blue dots and green dots mark the position of diolates and  $V_O$ -bound  $CH_2O$  molecules.

**S4** Another set of statistical analysis performed on the images of a surface at 180 K with less  $V_o$ -concentration (0.075 ML) to compliment Figure 3A.

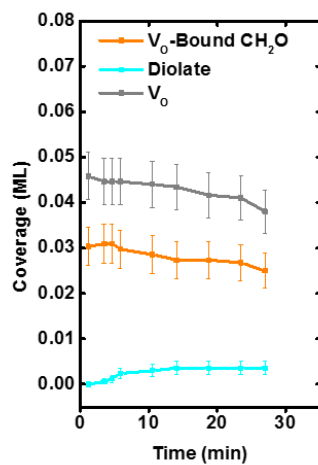

Supplement: Supplementary file 1 [file 3839044]
